1  
2  
3  
4  
5  
6  
7  
8  
9  
10  
11  
12  
13  
14  
15  
16  
17  
18  
19  
20  
21  
22  
23  
24  
25  
26  
27

## Cutting in-line with iron: ribosomal function and non-oxidative RNA cleavage

Rebecca Guth-Metzler<sup>1,2†</sup>, Marcus S. Bray<sup>2,3†§</sup>, Moran Frenkel-Pinter<sup>1,2</sup>, Suttipong Suttapitugsakul<sup>1</sup>, Claudia Montllor-Albalade<sup>1</sup>, Jessica C. Bowman<sup>1,2</sup>, Ronghu Wu<sup>1,4</sup>, Amit R. Reddi<sup>1,4</sup>, C. Denise Okafor<sup>5</sup>, Jennifer B. Glass<sup>2,4,6\*</sup>, and Loren Dean Williams<sup>1,2,4\*</sup>

<sup>1</sup>School of Chemistry and Biochemistry, Georgia Institute of Technology, Atlanta, GA, USA, 30332

<sup>2</sup>NASA Center for the Origin of Life, Georgia Institute of Technology, Atlanta, GA, USA, 30332

<sup>3</sup>School of Biological Sciences, Georgia Institute of Technology, Atlanta, GA, USA, 30332

<sup>4</sup>Petit Institute of Bioengineering and Bioscience, Georgia Institute of Technology, Atlanta, GA, USA, 30332

<sup>5</sup>Department of Biochemistry and Molecular Biology, The Pennsylvania State University, University Park, PA, 16802

<sup>6</sup>School of Earth and Atmospheric Sciences, Georgia Institute of Technology, Atlanta, GA, USA, 30332

\*To whom correspondence should be addressed: Tel: (404) 385-6258; Fax: (404) 894-2295;

Email: [Loren.Williams@chemistry.gatech.edu](mailto:Loren.Williams@chemistry.gatech.edu); Email: [Jennifer.Glass@eas.gatech.edu](mailto:Jennifer.Glass@eas.gatech.edu);

†These authors contributed equally to this work.

§Present Address: Department of Biology, San Diego State University, San Diego, CA, 92182

28 **Abstract**

29 Divalent metal cations are essential to the structure and function of the ribosome. Previous  
30 characterizations of the ribosome performed under standard laboratory conditions have implicated  
31  $Mg^{2+}$  as a primary mediator of ribosomal structure and function. Possible contributions of  $Fe^{2+}$  as  
32 a ribosomal cofactor have been largely overlooked, despite the ribosome's early evolution in a  
33 high  $Fe^{2+}$  environment, and its continued use by obligate anaerobes inhabiting high  $Fe^{2+}$  niches.  
34 Here we show that (i)  $Fe^{2+}$  cleaves RNA by in-line cleavage, a non-oxidative mechanism that has  
35 not previously been shown experimentally for this metal, (ii) the first-order rate constant with  
36 respect to divalent cations is more than 200 times greater with  $Fe^{2+}$  than with  $Mg^{2+}$ , (iii) functional  
37 ribosomes are associated with  $Fe^{2+}$  after purification from cells grown under low  $O_2$  and high  $Fe^{2+}$ ,  
38 and (iv) a small fraction of  $Fe^{2+}$  that is associated with the ribosome is not exchangeable with  
39 surrounding divalent cations, presumably because it is tightly coordinated by rRNA and buried in  
40 the ribosome. In total, these results expand the ancient role of iron in biochemistry and highlight a  
41 possible new mechanism of iron toxicity.

42 **Key Points:**

- 43 1)  $Fe^{2+}$  cleaves rRNA by a non-oxidative in-line cleavage mechanism that is more than 200  
44 times faster than in-line cleavage with  $Mg^{2+}$ ;
- 45 2) ribosomes purified from cells grown under low  $O_2$  and high  $Fe^{2+}$  retain ~10  $Fe^{2+}$  ions per  
46 ribosome and produce as much protein as low  $O_2$ , high  $Mg^{2+}$ -grown ribosomes;
- 47 3) a small fraction (~2%) of  $Fe^{2+}$  that is associated with the ribosome is not exchangeable.

48

49

50

51

52

53

## 54 Introduction

55 The translation system is responsible for the synthesis of all coded proteins and contains life's  
56 most conserved ribonucleic acids. The common core of the ribosome is universal to all life (1,2)  
57 and has been essentially invariant since the last universal common ancestor (3-5). Thus, ribosomes  
58 can be interrogated as molecular fossils (6-8). Because ribosomal structure and function are  
59 strongly dependent on divalent cations ( $M^{2+}$ ) (9), and because ribosomes originated long before  
60 the Great Oxidation Event (GOE), understanding ribosomal origins and evolution requires  
61 characterization of ribosomal interactions with  $M^{2+}$  ions under pre-GOE conditions (10-14).

62 In extant aerobic life,  $Mg^{2+}$  appears to be the dominant  $M^{2+}$  ion in the translation system. Hundreds  
63 of  $Mg^{2+}$  ions mediate ribosomal RNA (rRNA) folding and ribosomal assembly, in some instances  
64 binding to specific sites in the universal rRNA common core by direct coordination (9,15-17).  
65  $Mg^{2+}$  ions facilitate association of the large ribosomal subunit (LSU) and small ribosomal subunit  
66 (SSU) (18), stabilize folded tRNA (19), maintain the reading frame during translation (20), and  
67 link ribosomal proteins (rProteins) to rRNA (21).  $Mg^{2+}$  also catalyzes in-line cleavage (22-25), the  
68 reaction in which a divalent or trivalent metal catalyzes self-cleavage of RNA (26-29).

69 Before the GOE, anoxia would have stabilized abundant  $Fe^{2+}$  in the biosphere and hydrosphere.  
70 Under pre-GOE conditions,  $Fe^{2+}$  would not have caused the damage to biomolecules that occurs  
71 today in the presence of  $O_2$ , via Fenton chemistry (30). In Fenton chemistry  $H_2O_2$ , a product of  
72  $Fe^{2+}$  autoxidation by  $O_2$  (31), is reduced by  $Fe^{2+}$  generating hydroxyl radicals which can  
73 oxidatively damage nucleic acids (32-36). We recently reported that  $Fe^{2+}$  can fold RNA and  
74 mediate *in vitro* translation under “pre-GOE” conditions: in the presence of abundant  $Fe^{2+}$  and in  
75 the absence of  $O_2$  (37). Based on these findings, we proposed that early ribosomal folding and  
76 catalysis used  $Fe^{2+}$  instead of, or in combination with  $Mg^{2+}$  and other  $M^{2+}$  ions. However, we found  
77 lower translation rates with anoxic  $Fe^{2+}$  than with  $Mg^{2+}$  (37). While this observation could be  
78 partially explained by ribosomes adapting to the near-absence of  $Fe^{2+}$  and the presence of tens of  
79 mM  $Mg^{2+}$  in the ocean over the last two billion years, we assume that this explanation alone is  
80 insufficient because the catalytic core of the ribosome, and its central structure appears to be so  
81 conserved that it reflects the behavior of its evolutionary ancestor more than three billion years  
82 ago. One possible explanation for this finding is that non-oxidative damage of RNA mediated by  
83  $Fe^{2+}$  is faster than with  $Mg^{2+}$ .

84 Here we demonstrate that  $Fe^{2+}$  can damage RNA by in-line cleavage, which is distinct from  
85 previously characterized oxidative processes. We discovered that this second, non-oxidative  
86 mechanism of  $Fe^{2+}$ -mediated RNA damage by in-line cleavage can be more extensive in some  
87 conditions than oxidative damage. We show that anoxic  $Fe^{2+}$  is efficient in catalyzing in-line  
88 cleavage, cleaving rRNA far more rapidly and extensively than  $Mg^{2+}$ . Given that the reaction is  
89 likely first-order with respect to the metal (38,39), the reaction rate constant ( $M^{-1} s^{-1}$ ) appears to  
90 be over 200 times greater for rRNA with  $Fe^{2+}$  than with  $Mg^{2+}$ . The in-line mechanism of cleavage  
91 by  $Fe^{2+}$  was validated here by a variety of methods including reaction product characterization.

92 While metals such as  $Mg^{2+}$  cleave RNA, they are nonetheless essential for folding and function.  
93 In parallel with our experiments comparing  $Fe^{2+}$  and  $Mg^{2+}$  in-line cleavage, we investigated  
94 whether ribosomes from *E. coli* grown in pre-GOE conditions associate functionally with  $Fe^{2+}$  *in*  
95 *vivo*. We grew *E. coli* in anoxic conditions with ample  $Fe^{2+}$  in the growth media. We purified  
96 ribosomes from these bacteria and have probed their interactions with metals. We identified tightly

97 bound  $M^{2+}$ , which survive ribosomal purification. A small fraction (~2%) of  $Fe^{2+}$  ions are not  
98 exchangeable with  $Mg^{2+}$  in solution and are detectable after purification involving repeated washes  
99 in high  $[Mg^{2+}]$  buffers. We use these tightly bound ions as reporters for more general  $M^{2+}$   
100 association *in vivo*. The data are consistent with a model in which certain  $M^{2+}$  ions are deeply  
101 buried and highly coordinated within the ribosome (16). Our results suggest that ribosomes grown  
102 in pre-GOE conditions contain ~10 tightly bound  $Fe^{2+}$  ions compared to ~1  $Fe^{2+}$  ion in ribosomes  
103 from standard growth conditions. Ribosomes washed with  $Fe^{2+}$  contained significantly higher  $Fe^{2+}$   
104 and showed more rRNA degradation than ribosomes washed with  $Mg^{2+}$ . Our combined results  
105 show the capacity for  $Fe^{2+}$  to (i) associate with functional ribosomes *in vivo* and *in vitro* and (ii)  
106 mediate significant non-oxidative damage. Our results have significant implications for the  
107 evolution of rRNA and iron toxicity in disease.

## 108 **Materials and Methods**

109 *Ribosomal RNA purification.* A one-tenth volume of sodium acetate (3.0 M, pH 5.2) and an equal  
110 volume of 25:24:1 phenol:chloroform:isoamyl alcohol, pH 5.2 (Fisher BioReagents) were added  
111 to purified ribosomes. The sample was vortexed and spun at  $16,200 \times g$  in a table-top centrifuge  
112 for 5 minutes. The top aqueous layer was transferred to a new tube and extracted twice in a 24:1  
113 mixture of chloroform:isoamyl alcohol (Acros Organics) using the same procedure. rRNA was  
114 then precipitated by adding two volumes of 100% ethanol, followed by incubation at  $-20^{\circ}C$  for 30  
115 minutes. Precipitated rRNA was pelleted by centrifuging at  $16,100 \times g$  for 15 minutes. The pellet  
116 was washed with 70% ethanol and suspended in 0.1 mM sodium-EDTA (pH 8.0). Ribosomal RNA  
117 concentrations were quantified by  $A_{260}$  ( $1A_{260} = 40 \mu g$  rRNA  $mL^{-1}$ ).

118 *rRNA in-line cleavage reaction rates.* Nuclease free water (IDT) was used in all experiments  
119 involving purified or transcribed RNA. rRNA for in-line cleavage experiments was purified as  
120 above by phenol-chloroform extraction followed by ethanol precipitation of commercial *E. coli*  
121 ribosomes (New England Biolabs). All in-line cleavage reaction solutions were prepared and  
122 incubated in the anoxic chamber. Fe and Mg solutions were prepared by dissolving a known mass  
123 of  $FeCl_2 \cdot 4H_2O$  or  $MgCl_2$  salt in degassed water inside the chamber.  $0.5 \mu g \mu L^{-1}$  of rRNA was  
124 suspended in degassed 20 mM HEPES pH 7.6, 30 mM KCl, 5% v/v glycerol [Invitrogen  
125 (UltraPure)], and either 25 mM of  $MgCl_2$  or 1 mM of  $FeCl_2$ . Reactions were placed on a  $37^{\circ}C$  heat  
126 block and incubated for 4 days for the  $MgCl_2$  and no  $M^{2+}$  conditions and for 8 hours for the  $FeCl_2$   
127 conditions. At each time point (0, 1.5, 3, 6, 12, 24, 48, and 96 hours for the  $MgCl_2$  and no  $M^{2+}$   
128 conditions and 0, 7.5, 15, 30, 60, 120, 240, and 480 minutes for the  $FeCl_2$  conditions)  $4.5 \mu L$   
129 aliquots were combined with  $0.5 \mu L$  of 1 M sodium phosphate buffer pH 7.6 to precipitate the  $Fe^{2+}$   
130 or  $Mg^{2+}$  from solution and stored at  $-80^{\circ}C$ . Aliquots were defrosted on ice and combined with 2X  
131 Gel Loading Buffer II (Amicon) then loaded onto a 1% Tris/Borate/EDTA agarose gel and run at  
132 120V for 1.25 hours. The RNA in the gel was stained with GelStar<sup>TM</sup> (Lonza) and imaged with an  
133 Azure 6000 Imaging System (Azure Biosystems). Azurespot software was used as a pixel counter  
134 to create lane profiles. rRNA peaks were integrated by fitting to an Exponentially Modified  
135 Gaussian distribution using Igor Pro (v 7.08) (**Fig. S1**). Observed pseudo first-order rate constants  
136 ( $k_{obs}$ ) were found by taking the negative of the slope from the natural logarithm of the normalized  
137 peak area vs. time plot. Reaction rate constants ( $k$ ) were calculated by  $k = k_{obs}/[M^{2+}]$ .

138 *In-line cleavage banding patterns.* a-rRNA (40), which is composed of the core of the LSU rRNA,  
139 was synthesized and purified as previously described. Lyophilized a-rRNA was resuspended in

140 degassed nuclease free water (IDT) inside the anoxic chamber. Fe and Mg solutions were prepared  
141 by dissolving known amounts of  $\text{FeSO}_4 \cdot 7\text{H}_2\text{O}$  or  $\text{MgSO}_4$  in degassed nuclease free water inside  
142 the anoxic chamber. To initiate the reaction, 1 mM (final concentration) of Mg or Fe was added to  
143  $0.02 \mu\text{g} \mu\text{L}^{-1}$  a-rRNA in 20 mM HEPES-TRIS (pH 7.2) in a  $37^\circ\text{C}$  heat block. Samples were  
144 removed at 0, 0.25, 0.5, and 1 hr for added  $\text{Fe}^{2+}$ , and at 24 hrs for added  $\text{Mg}^{2+}$ . Divalent chelation  
145 beads (Hampton Research) were added to quench the reactions. Chelation beads were removed  
146 using spin columns. The RNA cleavage products were visualized using denaturing PAGE (6%,  
147 8M urea) run at 120 V for ~1.3 hours stained with SYBR Green II.

148 *Fenton chemistry reactions.* Purified rRNA from *E. coli* ribosomes (New England Biolabs) was  
149 obtained by phenol-chloroform extraction and ethanol precipitation as above. A stock solution of  
150 Fe/EDTA was prepared inside the anoxic chamber by dissolving a known amount of  $\text{FeCl}_2 \cdot 4\text{H}_2\text{O}$   
151 salt in degassed water then mixing with EDTA in degassed water. The Fe/EDTA was removed  
152 from the chamber for the Fenton reactions. Ribosomal RNA was suspended to  $0.5 \mu\text{g} \mu\text{L}^{-1}$  in 20  
153 mM HEPES pH 7.6, and 30 mM KCl, with 0% or 5% v/v glycerol and either 1 mM Fe/10 mM  
154 EDTA/10 mM ascorbate plus 0.3% v/v  $\text{H}_2\text{O}_2$  or 10 mM EDTA as the reaction initiators wherein  
155 the initiators were separately dispensed onto the tube wall then vortexed with the other  
156 components. For the zero time points, reaction components were mixed in tubes containing the  
157 thiourea quenching agent at a final concentration of 100 mM. For non-zero time points the reaction  
158 mixtures were prepared as bulk solutions and incubated at  $37^\circ\text{C}$  on a heat block, after which  
159 aliquots were removed at 0, 10, and 60 minutes and mixed with the thiourea quenching agent at a  
160 final concentration of 100 mM. The stopped solutions were immediately frozen and stored at -  
161  $80^\circ\text{C}$ . For analysis, samples were defrosted on ice, combined with 2X Gel Loading Buffer II  
162 (Amicon), loaded onto a 1% Tris/Borate/EDTA agarose gel and run at 120V for 1.25 hours.

163 *Characterization of ApA cleavage products by HPLC.* In-line cleavage reagents were prepared as  
164 previously described in the anoxic chamber. In duplicate reactions, 0.5 mM ApA RNA  
165 dinucleotide (5' to 3'; TriLink BioTechnologies) was suspended in degassed 20 mM  
166 HEPES/NaOH pH 7.6, 30 mM KCl, 5% v/v glycerol, and combined with either water, 25 mM  
167  $\text{MgCl}_2$  or  $\text{FeCl}_2$  (final concentration). Reactions were placed on a  $37^\circ\text{C}$  heat block with aliquots  
168 removed at 0, 0.25, 0.5, 1, 2, 4, and 8 days for no  $\text{M}^{2+}$  and  $\text{Mg}^{2+}$  samples and at 0, 0.25, 0.5, 1, and  
169 2 days for  $\text{Fe}^{2+}$  samples. Aliquots were immediately quenched with 100 mM final concentration  
170 sodium phosphate pH 7.6, centrifuged at  $2,000 \times g$  for 1 minute, and the ApA-containing  
171 supernatant was collected to avoid transfer of Fe or Mg phosphate precipitate to the HPLC column.  
172 The samples were stored at  $-80^\circ\text{C}$  prior to placement in the HPLC where they were held at  $4^\circ\text{C}$ .  
173 HPLC analyses were conducted on an Agilent 1260 Infinity HPLC with DAD UV-vis detector,  
174 with a path length of 1.0 cm. Products of the reactions were separated using a Kinetex XB-C18  
175 column ( $150 \times 2.1$  mm,  $2.6 \mu\text{m}$  particle size). The flow rate was  $0.3 \text{ mL min}^{-1}$  and the column  
176 temperature was held at  $25^\circ\text{C}$ . The mobile phase was water (0.1% formic acid) /acetonitrile. The  
177 gradient started with 100% water for the first 5 minutes and ramped to 55% acetonitrile over 25  
178 minutes. The acetonitrile concentration was then ramped to 100% and was held as such for 10  
179 minutes before returning to 100% water for column equilibration for 15 min. We recorded the  
180 elution at 210 nm, 220 nm, and 260 nm wavelengths, with a 180-400 nm spectrum detected in 2nm  
181 steps. To characterize reaction products, standards were spiked into product mixtures. The spiked  
182 standards were 0.5 mM ApA in 20 mM HEPES pH 7.6, 30 mM KCl, 5% v/v glycerol with either  
183 water,  $2.5 \mu\text{M}$  adenosine, 3'-adenosine monophosphate, or 2',3'-cyclic adenosine monophosphate.



184 *Characterization of ApA cleavage products by LC-MS.* ApA was anoxically resuspended at 0.5  
185 mM with 20 mM HEPES pH 7.6, 30 mM KCl, 5% v/v glycerol, and 25 mM FeCl<sub>2</sub>, and then  
186 incubated at 37°C for 2 days. The sample was analyzed by liquid chromatography mass  
187 spectrometry using and Agilent 1290 HPLC pump and thermostat; Agilent 1260 Autosampler and  
188 DAD UV-vis detector; path length: 0.6 cm; Agilent 1260 quaternary pump and RID; column:  
189 Phenomenex Kinetex 2.6 mmxB-C18100Å, LC column 150x2.1mm; column temp: 25°C; 10 µL  
190 injection with needle wash, 100 µL s<sup>-1</sup> injection speed. The solvents were A) 0.1% formic acid in  
191 LC-MS grade water, and B) LC-MS grade acetonitrile a flow rates of 0.3 mL min<sup>-1</sup>; gradient: 5  
192 min 100% A, 0% B; 20 min ramp to 45% A, 55% B; 10 min 0% A, 100% B; 1 min ramp 100% A,  
193 0% B; 9 min 100% A, 0% B. Elutions were recorded at 210, 220 and 260 nm, with the entire  
194 spectrum (180-400 nm) detected in 2 nm steps. This system was coupled to an Agilent 6130 single  
195 quad MS Electrospray Ionization Mass Spectrometry system with scanning of ±65 to ±2000 m/z  
196 and capillary voltage of 2.0kV.

197 *Cell culture and harvesting.* Culturing media consisted of LB broth (10 g L<sup>-1</sup> NaCl, 10 g L<sup>-1</sup>  
198 tryptone, 5 g L<sup>-1</sup> yeast extract) amended with 4 mM tricine, 50 mM sodium fumarate, and 80 mM  
199 3-(N-morpholino)propanesulfonic acid (MOPS; titrated with NaOH to pH 7.8). Fifty mL cultures  
200 containing all of these ingredients plus 0.25% v/v glycerol were inoculated from glycerol stocks  
201 of *Escherichia coli* MRE600 cells and shaken overnight at 37°C with or without O<sub>2</sub> and with either  
202 1 mM FeCl<sub>2</sub> or ambient Fe<sup>2+</sup> [6-9 µM, measured by the ferrozine assay (41)]. Two mL of each  
203 overnight culture was used to inoculate 1-L cultures in the same conditions. These cultures were  
204 then orbitally shaken at 37°C to OD<sub>600</sub> 0.6-0.7. Aerobic cultures were grown in foil-covered  
205 Erlenmeyer flasks. Anaerobic fumarate-respiring cultures were inoculated into stoppered glass  
206 bottles containing medium that had been degassed with N<sub>2</sub> for one hour to remove O<sub>2</sub>. Cells were  
207 then harvested by centrifugation at 4,415 × g for 10 minutes, washed in 20 mL buffer containing  
208 10 mM Tris pH 7.4, 30 mM NaCl, and 1 mM EDTA, and pelleted at 10,000 × g for 10 minutes.  
209 Cell pellets were stored at -80°C until ribosome purification.

210 *Ribosome purification.* The ribosome purification procedure was modified from Maguire et. al  
211 (42). All purification steps were performed in a Coy anoxic chamber (97% Ar, 3% H<sub>2</sub> headspace)  
212 unless otherwise noted. Buffers varied in their metal cation content. The typical wash buffer  
213 contained 100 mM NH<sub>4</sub>Cl, 0.5 mM EDTA, 3 mM β-mercaptoethanol, 20 mM Tris pH 7.5, 3 mM  
214 MgCl<sub>2</sub>, and 22 mM NaCl. For “Fe purification” experiments, buffer was composed of 100 mM  
215 NH<sub>4</sub>Cl, 0.5 mM EDTA, 3 mM β-mercaptoethanol, 20 mM Tris pH 7.5, 1 mM FeCl<sub>2</sub> and 28 mM  
216 NaCl. Sodium chloride concentrations were increased here to maintain the ionic strength of the  
217 buffer (131 mM). Elution buffers contained the same composition as the wash buffer except for  
218 NH<sub>4</sub>Cl (300 mM). Frozen cell pellets were resuspended in ribosome wash buffer and lysed in a  
219 BeadBug microtube compact homogenizer using 0.5 mm diameter zirconium beads (Benchmark  
220 Scientific). Cell lysate was transferred into centrifuge bottles inside the anoxic chamber which  
221 were tightly sealed to prevent O<sub>2</sub> contamination. Cell debris were removed by centrifuging outside  
222 of the anoxic chamber at 30,000 × g for 30 minutes at 4°C. The soluble lysate was then transferred  
223 back into the chamber and loaded onto a column containing pre-equilibrated, cysteine-linked,  
224 SulfoLink™ Coupling Resin (Thermo Fisher Scientific). The resin was washed with 10 column  
225 volumes of wash buffer. Ribosomes were eluted into three 10 mL fractions with elution buffer.  
226 Eluted fractions were pooled inside the anoxic chamber into ultracentrifuge bottles which were  
227 tightly sealed. Ribosomes were pelleted outside the chamber by centrifuging at 302,000 × g for 3  
228 hours at 4°C under vacuum in a Beckman Optima XPN-100 Ultracentrifuge using a Type 70 Ti

229 rotor. Tubes containing ribosome pellets were brought back into the chamber and suspended in  
230 buffer containing 20 mM N-(2-hydroxyethyl)piperazine-N'-2-ethanesulfonic acid (HEPES; pH  
231 7.6), 30 mM KCl, and 7 mM  $\beta$ -mercaptoethanol, heat-sealed in mylar bags, and stored at -80°C.  
232 Ribosome concentrations were calculated with a NanoDrop spectrophotometer assuming  $1A_{260} =$   
233  $60 \mu\text{g ribosome mL}^{-1}$  (conversion factor provided by New England Biolabs). This conversion  
234 factor was used to estimate the molecular mass of bacterial ribosomes, from which molarity was  
235 calculated. Biological triplicates of each growth and purification method were taken for  
236 downstream analyses.

237 *Ribosomal Fe content.* Purified ribosomes were analyzed for iron content by total reflection X-ray  
238 fluorescence spectroscopy (TRXF) as described in Bray and Lenz et al (37).

239 *rProtein electrophoresis.* For SDS-PAGE, purified ribosomes were normalized to  $3.33 \text{ mg mL}^{-1}$   
240 in 2X SDS-PAGE dye, heated at 95°C for 5 minutes, and then incubated on ice for 2 minutes.  
241 Samples were loaded onto a 12% SDS acrylamide gel with a 4% stacking gel and run at 180 V for  
242 60 minutes.

243 *In vitro translation.* Translation reactions were based on the methods of Bray and Lenz et al. (37)  
244 with minor modifications. All 15  $\mu\text{L}$  reactions contained 2.25  $\mu\text{L}$  of purified ribosome samples  
245 normalized to  $9 \mu\text{g } \mu\text{L}^{-1}$  (so that the final concentration of ribosomes in our reactions was  $1.35 \mu\text{g}$   
246  $\mu\text{L}^{-1}$ ), 0.1 mM amino acid mix, 0.2 mM tRNAs,  $\sim 0.2 \mu\text{g } \mu\text{L}^{-1}$  of dihydrofolate reductase mRNA,  
247 and 3  $\mu\text{L}$  of factor mix (with RNA polymerase, and transcription/translation factors in 10 mM  
248  $\text{Mg}^{2+}$ ) from the PURExpress®  $\Delta$  Ribosome Kit (New England Biolabs). The reaction buffer was  
249 based on Shimizu et al. (43), with HEPES instead of phosphate buffer to avoid precipitation of  
250 metal phosphates. Buffer consisted of 20 mM HEPES (pH 7.3), 95 mM potassium glutamate, 5  
251 mM  $\text{NH}_4\text{Cl}$ , 0.5 mM  $\text{CaCl}_2$ , 1 mM spermidine, 8 mM putrescine, 1 mM dithiothreitol (DTT), 2  
252 mM adenosine triphosphate (ATP), 2 mM guanosine triphosphate (GTP), 1 mM uridine  
253 triphosphate (UTP), 1 mM cytidine triphosphate (CTP), 10 mM creatine phosphate (CP), and 53  
254  $\mu\text{M}$  10-formyltetrahydrofolate. Divalent cation salts ( $\text{MgCl}_2$  or  $\text{FeCl}_2$ ) were added to 9 mM final  
255 concentration. The reaction buffer was lyophilized and stored at -80°C until resuspension in anoxic  
256 nuclease-free water immediately before experiments in the anoxic chamber. Reaction mixtures  
257 were assembled in the anoxic chamber and run at 37°C in a heat block for 120 minutes. Reactions  
258 were quenched on ice to terminate translation (43) and stored on ice until they were assayed for  
259 the extent of protein synthesis. Protein synthesis was measured using a DHFR assay kit (Sigma-  
260 Aldrich), which measures the oxidation of NADPH (60 mM) to  $\text{NADP}^+$  by dihydrofolic acid (51  
261  $\mu\text{M}$ ). Assays were performed by adding 5  $\mu\text{L}$  of protein synthesis reaction to 995  $\mu\text{L}$  of 1X assay  
262 buffer. The NADPH absorbance peak at 340 nm ( $\text{Abs}_{340}$ ) was measured in 15 s intervals over 2.5  
263 minutes. The slope of the linear regression of  $\text{Abs}_{340}$  vs. time was used to estimate protein activity  
264 ( $\text{Abs}_{340} \text{ min}^{-1}$ ).

265 *Protein characterization by LC-MS/MS.* After ribosomal purification, samples were reduced with  
266  $\beta$ -mercaptoethanol, and then alkylated with 14 mM iodoacetamide (HEPES, pH 7.6) for 30  
267 minutes at room temperature in the dark. Alkylation was quenched with 5 mM dithiothreitol for  
268 15 minutes at room temperature in the dark. Proteins were purified by the methanol/chloroform  
269 precipitation method and were then digested with trypsin in a buffer containing 5% acetonitrile,  
270 1.6 M urea, and 50 mM HEPES pH 8.8 at 37°C with shaking overnight. The digestion was  
271 quenched with addition of trifluoroacetic acid to a final concentration of  $\sim 0.2\%$ . Peptides were  
272 purified by Stage-Tip (44) prior to LC-MS/MS analysis.

273 Peptides were dissolved in a solution containing 5% acetonitrile and 4% formic acid and loaded  
274 onto a C18-packed microcapillary column (Magic C18AQ, 3  $\mu\text{m}$ , 200  $\text{\AA}$ , 75  $\mu\text{m}$   $\times$  16 cm, Michrom  
275 Bioresources) by a Dionex WPS-3000TPL RS autosampler (Thermostatted Pulled Loop Rapid  
276 Separation Nano/Capillary Autosampler). Peptides were separated by a Dionex UltiMate 3000  
277 UHPLC system (Thermo Scientific) using a 112-minute gradient of 4-17% acetonitrile containing  
278 0.125% formic acid. The LC was coupled to an LTQ Orbitrap Elite Hybrid Mass Spectrometer  
279 (Thermo Scientific) with Xcalibur software (version 3.0.63). MS analysis was performed with the  
280 data dependent Top15 method; for each cycle, a full MS scan with 60,000 resolution and  $1 \times 10^6$   
281 AGC (automatic gain control) target in the Orbitrap cell was followed by up to 15 MS/MS scans  
282 in the Orbitrap cell for the most intense ions. Selected ions were excluded from further sequencing  
283 for 90 seconds. Ions with single or unassigned charge were not sequenced. Maximum ion  
284 accumulation time was 1,000 ms for each full MS scan, and 50 ms for each MS/MS scan.

285 Raw MS files were analyzed by MaxQuant (version 1.6.2.3; 45). MS spectra were searched against  
286 the *E. coli* database from UniProt containing common contaminants using the integrated  
287 Andromeda search engine (46). Due to the unavailability of the proteome database for *E. coli* strain  
288 MRE-600, the database for strain K12 was used. It has been shown that the two strains have nearly  
289 identical ribosome associated proteins (47). All samples were searched separately and set as  
290 individual experiments. Default parameters in MaxQuant were used, except the maximum number  
291 of missed cleavages was set at 3. Label-free quantification was enabled with the LFQ minimum  
292 ratio count of 1. The match-between-runs option was enabled. The false discovery rates (FDR)  
293 were kept at 0.01 at both the peptide and protein levels.

294 The results were processed using Perseus software (48). In the final dataset, the reverse hits and  
295 contaminants were removed. The LFQ intensity of each protein from the proteinGroups table was  
296 extracted and reported. For the volcano plots showing differential regulation of proteins, the ratios  
297 used were from the LFQ intensities of samples from each of the three experiments. The cutoff for  
298 differential expression was set at 2-fold. P-values were calculated using a two-sided T-test on  
299 biological triplicate measurements with the threshold p-value of 0.05 for significant regulation.  
300 The raw files are publicly available at <http://www.peptideatlas.org/PASS/PASS01418> (username:  
301 PASS01418 and password: ZW2939nnw).

## 302 Results

303 *In-line cleavage of rRNA: Mg<sup>2+</sup> and anoxic Fe<sup>2+</sup>*. By manipulating reaction conditions, we could  
304 switch the mode of rRNA cleavage between Fenton and in-line mechanisms. In-line is the only  
305 possible mechanism of cleavage by Mg<sup>2+</sup> due to its fixed oxidation state and inability to generate  
306 hydroxyl radicals. We confirm the expectation that Mg<sup>2+</sup>-mediated in-line cleavage reactions are  
307 not inhibited by anoxia or hydroxyl radical quenchers (**Fig. S2**).

308 We confirm here in a variety of experiments that RNA is degraded by in-line cleavage when  
309 incubated with Fe<sup>2+</sup> under anoxic conditions (**Fig. 1a**). Most of the experiments employed the  
310 rRNA of *E. coli* as substrate. A shorter RNA [a-RNA (40)] showed on a higher size resolution gel  
311 that RNA banding patterns and reaction products were nearly identical for Mg<sup>2+</sup> and anoxic Fe<sup>2+</sup>  
312 reactions (**Fig. 2**), indicating that preferred sites of cleavage are the same for both metals. Common  
313 sites of cleavage are indications of common mechanisms of cleavage (23). Neither Mg<sup>2+</sup> nor anoxic  
314 Fe<sup>2+</sup> cleavage was inhibited by glycerol (5%), which is known to quench hydroxyl radical and to  
315 inhibit hydroxyl radical cleavage (49). By contrast, glycerol inhibited cleavage by Fe<sup>2+</sup> under



316 conditions that favor Fenton-type cleavage (**Fig. S3**). Glycerol did not inhibit  $Mg^{2+}$  in-line  
317 cleavage under any conditions (**Fig. S2**).

318 In the absence of  $O_2$ , cleavage rates are significantly greater for  $Fe^{2+}$  than for  $Mg^{2+}$ . For 16S and  
319 23S rRNAs, 1 mM  $Fe^{2+}$  caused significant in-line cleavage of rRNA after 30 minutes at 37°C.  
320 Both rRNAs were completely degraded after 2 hours in anoxic  $Fe^{2+}$  (**Fig. 1a**). By contrast, when  
321 the  $M^{2+}$  ion was switched from 1 mM  $Fe^{2+}$  to 25 mM  $Mg^{2+}$ , only a modest amount of in-line  
322 cleavage was observed after 6 hours (**Fig. 1b**). Fitting of the data to a pseudo first-order rate model  
323 (**Fig. 1c and 1d**) reveals apparent rate constants for cleavage of the full-length 23S rRNA with  
324  $Fe^{2+}$  is  $67 \times 10^{-5} s^{-1}$  and with  $Mg^{2+}$  is  $5 \times 10^{-5} s^{-1}$ . The rate constants for cleavage of the 16S rRNA  
325 is  $25 \times 10^{-5} s^{-1}$  for  $Fe^{2+}$  and  $3 \times 10^{-5} s^{-1}$  for  $Mg^{2+}$  (**Table 1**). These apparent rate constants do not  
326 account for differences in metal concentration or in RNA length.

327 In sum, reactions with  $Mg^{2+}$  and anoxic  $Fe^{2+}$  showed a lack of inhibition by a hydroxyl radical  
328 quencher. By contrast, the quencher inhibited reactions with  $Fe^{2+}$  in the presence of  $O_2$ . The  
329 observed rate constant for in-line cleavage for rRNA is ~10 times greater for 1 mM  $Fe^{2+}$  than for  
330 25 mM  $Mg^{2+}$ . Under these conditions, in-line cleavage is expected to scale with metal  
331 concentration (38,39) so that that the reaction rate constant,  $k$  ( $M^{-1} s^{-1}$ ), is increased with  $Fe^{2+}$  by  
332 ~300 times for the 23S and by ~200 times for the 16S. We demonstrate that although  $Fe^{2+}$  interacts  
333 in the same way as  $Mg^{2+}$  with RNA, the cleavage potency of  $Fe^{2+}$  is greatly enhanced.

334 *Characterization of in-line cleavage reaction products.* To confirm that  $Fe^{2+}$  catalyzes non-  
335 oxidative in-line RNA cleavage, a series of cleavage reactions were performed on the dinucleotide  
336 ApA. The products of the reaction were characterized by HPLC via spiking with standards, and  
337 by LC-MS. A small RNA with only one possible cleavage site allowed us to identify specific  
338 cleavage products, which report on the mechanism of scission. In-line cleavage leads to 2',3'-  
339 cyclic phosphate upstream of the scission site and a downstream 5'OH RNA fragment.  
340 Subsequently, the 2',3'-cyclic phosphate can hydrolyze to either a 2' or 3' monophosphate.  
341 Conversely, oxidative cleavage of RNA by a hydroxyl radical that may be formed during iron  
342 oxidative processes abstracts a proton from a ribose sugar leading to a variety of products but not  
343 2',3'-cyclic phosphate, 2'-phosphate, or 3'-phosphate RNA fragment (50). Anoxic incubation of  
344 ApA with 25 mM  $Mg^{2+}$  or  $Fe^{2+}$  produces adenosine, 2',3'-cyclic adenosine monophosphate (2',3'-  
345 cAMP), and 3'-adenosine monophosphate (3'-AMP) (**Fig. 3a-d** and **Fig. S4**). The repertoire of  
346 products is matched for the two metals, pointing to a common in-line cleavage mechanism.

347  *$M^{2+}$  exchange during ribosomal purification.* We hypothesized that  $O_2$  and  $Fe^{2+}$  content during  
348 bacterial growth could affect the iron content of ribosomes. However, the vast majority of  
349 ribosomal  $M^{2+}$  ions are exchangeable (51) and canonical ribosome purification procedures use  
350 high  $Mg^{2+}$  buffers (52) to maintain folding and stability. Therefore, spontaneous exchange of *in*  
351 *vivo* bound  $M^{2+}$  with those in the buffer occurs during purification, suggesting that the final  $Fe^{2+}$   
352 content of purified ribosomes depends on the type of  $M^{2+}$  in the purification buffer. Indeed,  
353 ribosomes purified in solutions with 1 mM  $Fe^{2+}$  contained significantly higher  $Fe^{2+}$  than those  
354 purified in 3 mM  $Mg^{2+}$  regardless of growth condition (**Fig. 4**). All ribosome samples purified in  
355 1 mM  $Fe^{2+}$  contained similar  $Fe^{2+}$  (~400-600 mol Fe mol<sup>-1</sup> ribosome). These results show that the  
356 vast majority of ribosomal  $M^{2+}$  ions are exchangeable and that  $M^{2+}$  exchange takes place during  
357 purification.

358 *Tight ribosomal binding of a subset of  $M^{2+}$ .* A small subset of ribosomal  $M^{2+}$  ions are not  
359 exchangeable during purification. Ribosomes retain this subset of *in vivo* divalent cations after  
360 purification. We harvested *E. coli* in log phase from four growth conditions: oxic or anoxic with  
361 high  $Fe^{2+}$  in the medium (1 mM  $Fe^{2+}$ ), and oxic or anoxic without added  $Fe^{2+}$  in the growth medium  
362 (6-9  $\mu M$   $Fe^{2+}$ ). Ribosomes from *E. coli* grown in pre-GOE conditions (anoxic, high  $Fe^{2+}$ ) contained  
363 quantitatively reproducible elevated levels of  $Fe^{2+}$  after purification in solutions containing  $Mg^{2+}$ .  
364 We detected around 9 mol  $Fe$  mol<sup>-1</sup> ribosome from cells grown in pre-GOE conditions purified in  
365 solutions with high  $Mg^{2+}$  (**Fig. 4**). The three other growth conditions yielded ribosomes containing  
366 near background levels of  $Fe^{2+}$  (< 2 mol  $Fe$  mol<sup>-1</sup> ribosome).

367 *Quantitating translation.* Ribosomes from all four growth conditions produced active protein in  
368 translation assays. Ribosomes were functional *in vitro* under standard conditions (with 10 mM  
369  $Mg^{2+}$ ) and also in 8 mM  $Fe^{2+}$  + 2 mM  $Mg^{2+}$  under anoxia. Regardless of whether translation activity  
370 was assayed in the presence of 10 mM  $Mg^{2+}$  or 8 mM  $Fe^{2+}$  + 2 mM  $Mg^{2+}$ , ribosomes synthesized  
371 aerobically in the absence of  $Fe^{2+}$  have higher activity than the ribosomes synthesized  
372 anaerobically in the absence of  $Fe^{2+}$  ( $p < 0.08$ ; **Fig. S5**). The presence of 1 mM  $Fe^{2+}$  in the bacterial  
373 growth conditions did not affect ribosomal activity; the only differences are whether growth  
374 conditions are aerobic or anaerobic, and whether 10 mM  $Mg^{2+}$  or 8 mM  $Fe^{2+}$  + 2 mM  $Mg^{2+}$  are  
375 used in the assay. Translation was reduced in the presence of  $Fe^{2+}$  compared to  $Mg^{2+}$ , consistent  
376 with our previous work (37). The translational activity of ribosomes harvested from anaerobic cells  
377 was slightly less than from those from aerobic cells. Ribosomes from all four growth conditions  
378 contained intact 23S, 16S, and 5S rRNAs with purification in 3 mM  $Mg^{2+}$  (**Fig. 5a**) resulting in a  
379 higher proportion of intact rRNA relative to purification in 1 mM  $Fe^{2+}$  (**Fig. 5b**). Each purification  
380 also contained a full suite of rProteins as indicated by mass spectrometric analysis and by gel  
381 electrophoresis (**Fig. S6**). The protein composition of ribosomes from 1 mM  $Fe^{2+}$  growth  
382 conditions (**Fig. S6b**) was similar to that from  $Mg^{2+}$  growth conditions (**Fig. S6a**).

383 *rProtein characterization.* In addition to oxidative mechanism, our results pointed to a non-  
384 oxidative cleavage mechanism of RNA with  $Fe^{2+}$ . So, we next asked whether ribosomes might  
385 adopt different proteins to cope with high  $Fe^{2+}$  in both oxic and anoxic conditions. Ribosomes  
386 under all four growth conditions contained a full repertoire of rProteins, and were associated with  
387 additional proteins, as determined by mass spectrometry. These non-ribosomal proteins ranged in  
388 function from translation to central metabolism. Proteins from anaerobic pathways were generally  
389 more abundant in ribosomes from anaerobic cells while proteins from aerobic pathways were more  
390 abundant in ribosomes from aerobic cells (**Tables S1, S2**). Proteins for synthesis of enterobactin,  
391 an  $Fe^{3+}$ -binding siderophore, were more abundant in ribosomes from aerobic cells and from those  
392 grown without the addition of  $Fe$ , while the bacterial non-heme ferritin subunit was more abundant  
393 in ribosomes from anaerobic cells regardless of the  $Fe^{2+}$  content in the media (**Table S2**). Several  
394 proteins were differentially expressed in ribosomes grown in pre-GOE conditions relative to other  
395 growth conditions (**Fig. S7**). Notably, ribosomes grown anaerobically with high  $Fe^{2+}$  had five  
396 times the abundance of the protein YceD than ribosomes grown anaerobically without added  $Fe^{2+}$ .  
397 Anaerobic high  $Fe^{2+}$  ribosomes had one third the abundance of the rProtein S12  
398 methyltransferase protein RimO and rRNA LSU methyltransferase K/L protein RlmL than  
399 ribosomes from aerobically grown cells with 1 mM  $Fe^{2+}$ .

## 400 Discussion

401 *Iron promotes rapid in-line cleavage of rRNA.*  $Mg^{2+}$  is known to cleave the RNA phosphodiester  
402 backbone via an in-line mechanism (22,23). We have shown here that  $Fe^{2+}$ , like  $Mg^{2+}$ , can cleave  
403 RNA by a non-oxidative in-line mechanism. We used cleavage of 23S and 16S rRNA to determine  
404 the observed rate constants of both  $Mg^{2+}$ - and  $Fe^{2+}$ - mediated cleavage. The  $k_{obs}$ , uncorrected for  
405 metal concentration, for in-line cleavage by  $Fe^{2+}$  is around 10 times greater than for  $Mg^{2+}$ . Previous  
406 studies of metal concentration effects on  $k_{obs}$  suggest that in-line cleavage is first-order with respect  
407 to metal concentration (38,39), allowing the calculation of a per molar metal reaction rate constant  
408 by  $k = k_{obs}/[M^{2+}]$ . Assuming this first-order relationship in our experiments,  $k$  with  $Fe^{2+}$  is ~300  
409 times greater for the 23S and ~200 times greater for the 16S than with  $Mg^{2+}$ . In **Table S3** we  
410 compare our results to literature  $k$  values of  $Mg^{2+}$  and  $Zn^{2+}$  in-line cleavage taken under a range of  
411 conditions (38,39,53-57), normalizing for the number of cleavable phosphates in the RNA  
412 substrate. Changes in metal identity, RNA length, RNA folding, pH, and temperature, result in  
413 differences in normalized rate constants. The values extend over four orders of magnitude. Rate  
414 enhancement by switching  $Mg^{2+}$  to another metal while other conditions are held constant is  
415 greater for  $Fe^{2+}$  than for  $Zn^{2+}$ , highlighting the rapidity of cleavage by  $Fe^{2+}$ .

416 Support for a non-oxidative in-line mechanism of cleavage of RNA by anoxic  $Fe^{2+}$  is provided by  
417 observations that the rate of the reaction is not attenuated by anoxia and that the sites of cleavage  
418 appear to be conserved for  $Mg^{2+}$  and anoxic  $Fe^{2+}$ . The absence of hydroxyl radical intermediates  
419 in the anoxic cleavage reaction is confirmed by the lack of inhibition by a hydroxyl radical  
420 quencher known to inhibit Fenton chemistry (32). Cleavage products of the RNA dinucleotide  
421 ApA include only those that are expected from an in-line mechanism and align with products  
422 formed with  $Mg^{2+}$ . Among these is 2',3'-cyclic phosphate, the hallmark of in-line attack of the  
423 bridging phosphate by the 2'OH.

424 In-line cleavage is the dominant mechanism of  $Fe^{2+}$  cleavage when contributions from Fenton-  
425 mediated processes are minimized and is the only mechanism of  $Mg^{2+}$  cleavage. By contrast, in  
426 oxic environments, transient  $Fe^{2+}$  oxidation generates hydroxyl radicals (31) that cleave nucleic  
427 acids (30,32-35). Our results have significant implications for iron toxicity and human disease.  
428 The potency of  $Fe^{2+}$  in inducing rRNA cleavage may lead to decreased longevity of  $Fe^{2+}$ -  
429 containing ribosomes. In fact, rRNA cleavage linked to  $Fe^{2+}$  oxidation, as in the human ribosome  
430 in Alzheimer's disease (58), or in yeast rRNA (59), could be in some measure attributable to  $Fe^{2+}$   
431 in-line cleavage.

432  $Fe^{2+}$  appears to be a potent all-around cofactor for nucleic acids. The combined results indicate  
433 that:

- 434 a) rRNA folds at lower concentration of  $Fe^{2+}$  than  $Mg^{2+}$  (37),
- 435 b) at least a subset of ribozymes and DNazymes are more active in  $Fe^{2+}$  than in  $Mg^{2+}$  (60,61),
- 436 c) the translation system is functional when  $Fe^{2+}$  is the dominant divalent cation (37),
- 437 d) at low concentrations of  $M^{2+}$ , T7 RNA polymerase is more active with  $Fe^{2+}$  than with  $Mg^{2+}$   
438 (62),
- 439 e) a broad variety of nucleic acid processing enzymes are active with  $Fe^{2+}$  instead of  $Mg^{2+}$   
440 (62),
- 441 f) rates of in-line cleavage are significantly greater for  $Fe^{2+}$  than for  $Mg^{2+}$  (here), and
- 442 g)  $Fe^{2+}$  but not  $Mg^{2+}$  confers oxidoreductase functionality to some RNAs (17,63).

443 *Why so fast?* Our previous DFT computations (62) help explain why  $\text{Fe}^{2+}$  is such a potent cofactor  
444 for RNA. Conformations and geometries of coordination complexes with water and/or phosphate  
445 are nearly identical for  $\text{Fe}^{2+}$  or  $\text{Mg}^{2+}$ . However, differences between  $\text{Mg}^{2+}$  and  $\text{Fe}^{2+}$  are seen in the  
446 electronic structures of coordination complexes.

447 Firstly, because of low lying d orbitals,  $\text{Fe}^{2+}$  has greater electron withdrawing power than  $\text{Mg}^{2+}$   
448 from first shell phosphate ligands. In coordination complexes with phosphate groups, the  
449 phosphorus atom is a better electrophile when  $\text{M}^{2+} = \text{Fe}^{2+}$  than when  $\text{M}^{2+} = \text{Mg}^{2+}$ . This difference  
450 between  $\text{Mg}^{2+}$  and  $\text{Fe}^{2+}$  is apparent in both ribozyme reactions and in-line cleavage reactions.

451 Secondly,  $\text{Fe}^{2+}(\text{H}_2\text{O})_6$  is a stronger acid than  $\text{Mg}^{2+}(\text{H}_2\text{O})_6$ ; depletion of electrons is greater from  
452 water molecules that coordinate  $\text{Fe}^{2+}$  than from those that coordinate  $\text{Mg}^{2+}$ . The lower pKa of  
453  $\text{Fe}^{2+}(\text{H}_2\text{O})_6$  may promote protonation of the 5'OH leaving group during cleavage. Metal hydrates  
454 with low pKa's have been reported to induce RNA cleavage better than less acidic metal hydrates  
455 (22).

456 In in-line cleavage, RNA coordinates  $\text{M}^{2+}$  or the  $\text{M}^{2+}$  hydrate (22,23). Indeed, studies of the in-line  
457 cleavage fragment patterns have previously been used to probe structural information on RNA  
458 molecules, such as metal-binding sites (26,27). We demonstrated with ApA that RNA secondary  
459 structure is not required for in-line cleavage. The same activities that drive in-line cleavage (e.g.  
460 2'OH activation and coordination of the leaving group) are thought to occur in metal-catalyzed  
461 ribozyme cleavage (64). Multiple ribozymes (60) and DNAzymes (61) have been observed to  
462 function with  $\text{Fe}^{2+}$  as a cofactor. Our results with  $\text{Fe}^{2+}$  in-line cleavage, and in-line cleavage in  
463 general, require no enzymatic activity.

464 The remarkably high cleavage activity of  $\text{Fe}^{2+}$  with RNA demonstrated here bears relevance to  
465 prebiotic chemistry and early biochemistry. Because these reactions are catalytic, they increase  
466 both forward and reverse reaction rates. RNA degradation through  $\text{Fe}^{2+}$  cleavage should be  
467 weighed against potential RNA polymerization and the benefits of increased catalytic activity. The  
468 same dualism exists with  $\text{Mg}^{2+}$ , but our work suggests higher stakes with  $\text{Fe}^{2+}$ . At the extremes,  
469 without  $\text{M}^{2+}$ , RNA cannot form complex folds and has few avenues for catalytic or functional  
470 activity while with excessive  $\text{M}^{2+}$  RNA is degraded. There theoretically exists some point of  
471 balance wherein  $\text{M}^{2+}$  is beneficially utilized with some frequency of disabling cleavage. Given the  
472 increased potency of cleavage with  $\text{Fe}^{2+}$  relative to  $\text{M}^{2+}$ , this balancing point may be at a lower  
473 concentration of  $\text{Fe}^{2+}$  than  $\text{Mg}^{2+}$ . However, enhanced cofactor characteristics of  $\text{Fe}^{2+}$  may allow  
474 RNA to access more functions using less metal. On early Earth, heightened RNA cleavage in the  
475 presence of  $\text{Fe}^{2+}$  if balanced by a similar rate of RNA resupply would allow functional space to be  
476 explored in short time. RNAs would be selected that could cooperate with or tolerate a potent  
477 metal.  $\text{Fe}^{2+}$  may have been a force for accelerated RNA evolution on early Earth.

478 *Fe<sup>2+</sup> associates with rRNA in vivo.* Exchange of non-native metals for native metals is well-known  
479 during purification of proteins (51). We observe analogous phenomena with rRNA.  $\text{Fe}^{2+}$  can  
480 exchange with  $\text{Mg}^{2+}$  (and vice versa) during purification of ribosomes. Ribosomes purified in  
481 either  $\text{Fe}^{2+}$  or  $\text{Mg}^{2+}$  associate with 500-1000  $\text{M}^{2+}$  ions that match the type of ion in the purification  
482 buffers. Our data support the tight association and lack of exchange of around 9  $\text{M}^{2+}$  per ribosome.  
483 This subset of  $\text{M}^{2+}$  do not exchange during purification. The number of non-exchangeable  $\text{M}^{2+}$   
484 closely matches the number of  $\text{M}^{2+}$  identified previously as a special class of deeply buried and  
485 highly coordinated  $\text{M}^{2+}$  in dinuclear microclusters ( $\text{M}^{2+}$ - $\mu\text{c}$ 's) (16).  $\text{Mg}^{2+}$  ions in  $\text{M}^{2+}$ - $\mu\text{c}$ 's are



486 directly chelated by multiple phosphate oxygens of the rRNA backbone and are substantially  
487 dehydrated.  $M^{2+}$ - $\mu c$ 's within the LSU provide a framework for the ribosome's peptidyl transferase  
488 center, the site of protein synthesis in the ribosome, suggesting an essential and ancient role for  
489  $M^{2+}$ - $\mu c$ 's in the ribosome. There are four dinuclear  $M^{2+}$ - $\mu c$ 's in the LSU and one in the SSU,  
490 accounting for 10  $M^{2+}$  (16). Displacement of these  $M^{2+}$  would require large-scale changes in  
491 ribosomal conformation. In sum, there are ten  $M^{2+}$  per ribosome that are expected to be refractory  
492 to exchange. We hypothesize that this subset  $M^{2+}$  are contained in  $M^{2+}$ - $\mu c$ 's, which can be  
493 occupied by either  $Mg^{2+}$  or  $Fe^{2+}$  (17), depending on growth conditions.

494 We also hypothesize that ribosomes harvested from aerobic cells have low  $Fe^{2+}/Mg^{2+}$  ratios  
495 because of low intracellular  $Fe^{2+}$  availability and lability. This hypothesis is supported by our  
496 observation that the number of slow exchanging  $Fe^{2+}$  per ribosome from aerobic cells is near the  
497 baseline of our measurements. It appears that ribosomes harvested from pre-GOE conditions have  
498 high  $Fe^{2+}/Mg^{2+}$  ratios because of high intracellular  $Fe^{2+}$  availability and lability, as indicated by  
499 the close match in the number of slowly exchanging  $Fe^{2+}$  per ribosome and the number of available  
500  $M^{2+}$  sites in ribosomal  $M^{2+}$ - $\mu c$ 's. In these experiments we detect only the  $Fe^{2+}$  ions that do not  
501 exchange during purification.

502 *Anoxic  $Fe^{2+}$  degrades rRNA within ribosomes.* rRNA from all four growth conditions showed  
503 partial hydrolysis when ribosomes were purified in anoxic  $Fe^{2+}$ . It appears that  $Fe^{2+}$  can mediate  
504 rRNA degradation by an in-line mechanism during ribosomal purification in anoxic  $Fe^{2+}$ . Less  
505 rRNA cleavage was observed in ribosomes purified with  $Mg^{2+}$ , which contain orders of magnitude  
506 lower  $Fe^{2+}$ .

507 *Summary.* Here we have shown for the first time that bacteria grown in pre-GOE conditions contain  
508 functional ribosomes with tightly bound Fe atoms. The  $\sim 10$  ribosomal Fe ions in ribosomes grown  
509 anoxically with high  $Fe^{2+}$  are likely deeply buried and specifically bound to rRNA. Depending on  
510 intracellular Fe lability, ribosomes may have higher Fe content *in vivo* given the high capacity for  
511 the ribosome to substitute  $\sim 600$  loosely bound  $Mg^{2+}$  ions for  $Fe^{2+}$ . Furthermore, direct association  
512 of the rRNA with Fe atoms results in a fast rate of in-line cleavage. 1 mM  $Fe^{2+}$  gives a  $\sim 10$  times  
513 higher  $k_{obs}$  than does 25 mM  $Mg^{2+}$  so that the assumed per molar metal rate constant is hundreds  
514 of times greater with  $Fe^{2+}$  than with  $Mg^{2+}$ . This highlights a potential role of protection from in-  
515 line cleavage for rProteins and suggests that  $Fe^{2+}$  may drive rapid cycling of RNA between  
516 monomers and polymers. Our results support a model in which alternate  $M^{2+}$  ions, namely  $Fe^{2+}$ ,  
517 participated in the origin and early evolution of life: first in abiotic proto-biochemical systems,  
518 through potentially rapid rounds of formation and breakdown of RNA structures, and then within  
519 early cellular life up until the GOE (65). Our study also expands the role of  $Fe^{2+}$  in modern  
520 biochemistry by showing that extant life retains the ability to incorporate Fe into ribosomes. We  
521 surmise that extant organisms under certain environmental and cellular states may use  $Fe^{2+}$  as a  
522 ribosomal cofactor. In addition, obligate anaerobic organisms that have spent the entirety of their  
523 evolutionary history in permanently anoxic environments may still use abundant  $Fe^{2+}$  in their  
524 ribosomes *in vivo*.

525 **Funding.** This work was supported by the National Aeronautics and Space Administration  
526 Astrobiology program grants NNX14AJ87G, NNX16AJ28G, NNX16AJ29G, and  
527 80NSSC18K1139 under the Center for Origin of Life. The TXRF was supported by National  
528 Institutes of Health Grant ES025661 (to A. R. R.) and National Science Foundation Grant MCB-  
529 1552791 (to A. R. R.).



530

531 **Acknowledgments.** We thank Corinna Tuckey (New England BioLabs), Eric B. O’Neill, and Drs.  
532 Anton Petrov, Roger M. Wartell, Thomas Tullius, and Ada Yonath for helpful discussions.

533

534

**Table 1: rRNA cleavage pseudo first-order rate constants**

| Metal                  | rRNA | $k_{\text{obs}}$ ( $10^{-5} \text{ s}^{-1}$ ) | S.E.M. ( $10^{-5} \text{ s}^{-1}$ ) |
|------------------------|------|-----------------------------------------------|-------------------------------------|
| 1 mM $\text{Fe}^{2+}$  |      |                                               |                                     |
|                        | 23S  | 67                                            | 12                                  |
|                        | 16S  | 25                                            | 8.2                                 |
| 25 mM $\text{Mg}^{2+}$ |      |                                               |                                     |
|                        | 23S  | 5                                             | 1.1                                 |
|                        | 16S  | 3                                             | 0.8                                 |

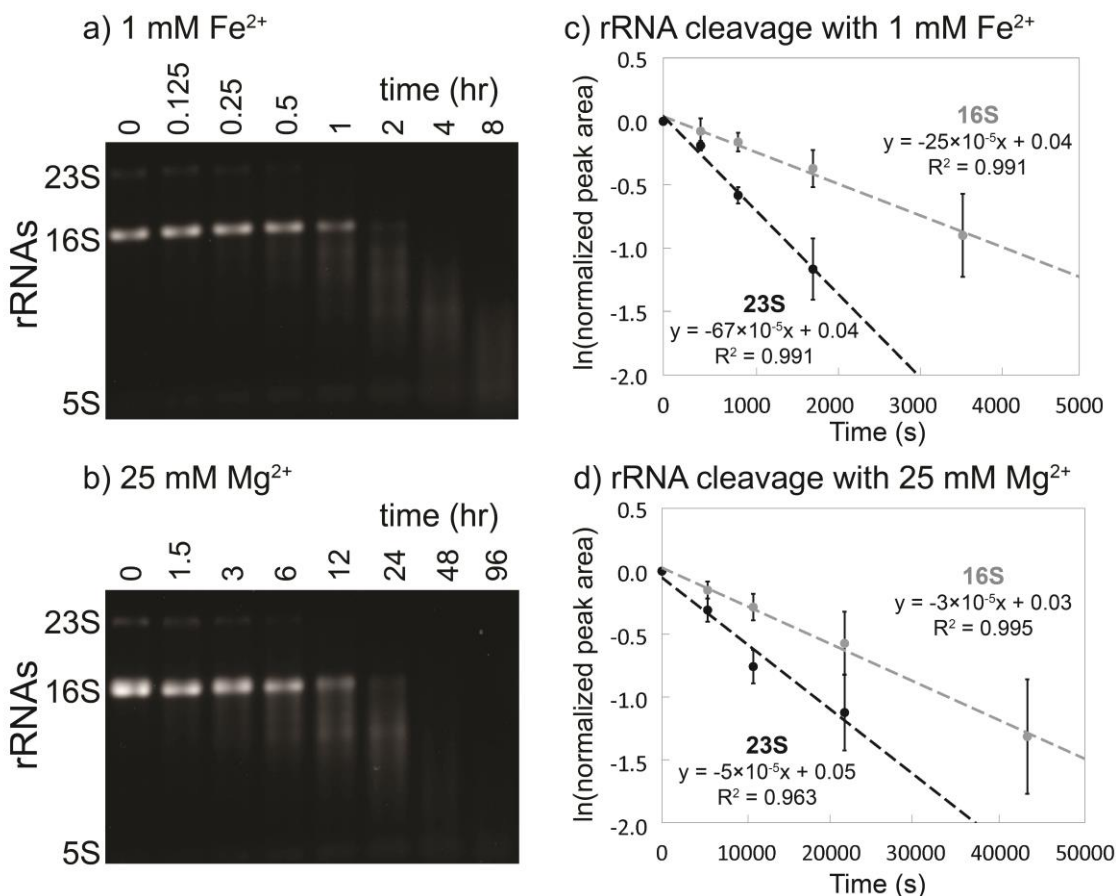

535

536 **Figure 1. In-line cleavage of rRNA in anoxia.** In-line cleavage of purified rRNAs with a) 1 mM  
537 Fe<sup>2+</sup> (0-8 hr) and b) 25 mM Mg<sup>2+</sup> (0-96 hr). Reactions were conducted in an anoxic chamber at  
538 37°C in the presence of the hydroxyl radical quencher glycerol (5% v/v) and were analyzed by 1%  
539 agarose gels. Pseudo first-order rate plots were extracted from 23S and 16S band intensity for c) 1  
540 mM Fe<sup>2+</sup> and d) 25 mM Mg<sup>2+</sup> conditions. The Mg<sup>2+</sup> time axis is 10 times greater than the Fe<sup>2+</sup> time  
541 axis. Error bars represent the S.E.M. (n = 3).

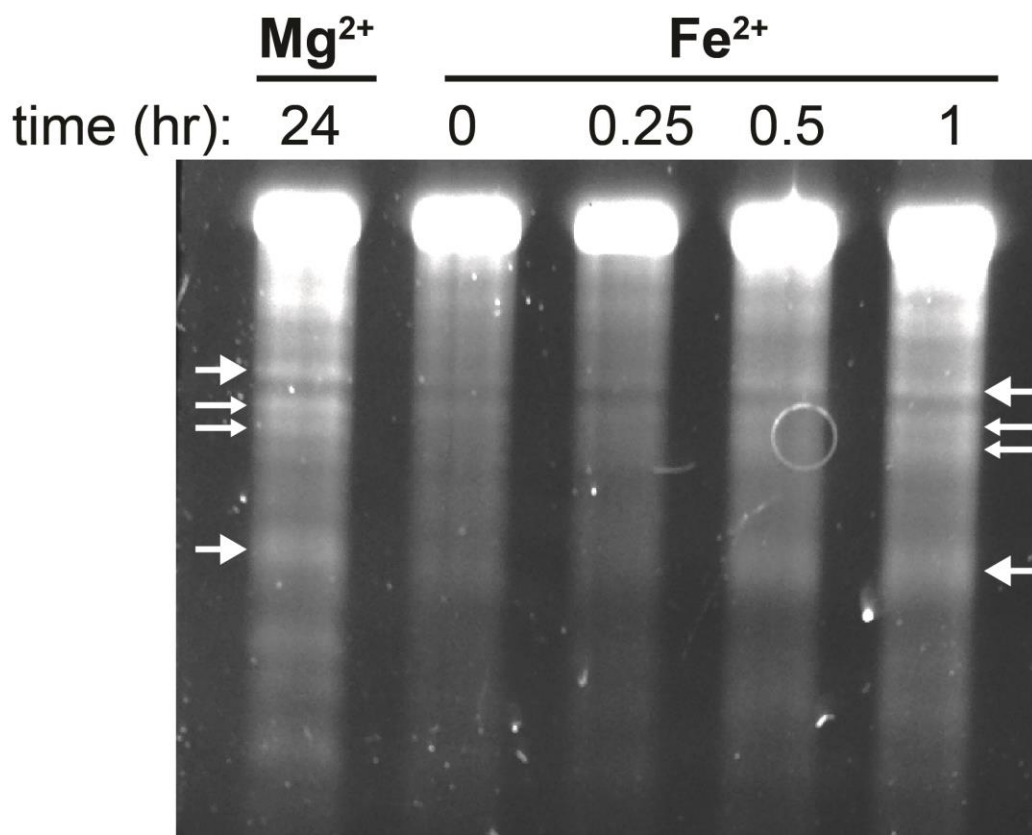

542

543 **Figure 2. In-line cleavage banding patterns are the same for rRNA cleavage with Mg<sup>2+</sup> and**  
544 **anoxic Fe<sup>2+</sup>.** Several primary cleavage bands of a-rRNA (40) are indicated by arrows. This gel is  
545 6% polyacrylamide, 8 M urea showing in-line cleavage mediated by 1 mM Mg<sup>2+</sup> or 1 mM anoxic  
546 Fe<sup>2+</sup> at 37°C for varying amounts of time. Reactions were run in 20 mM Tris-HEPES, pH 7.2.

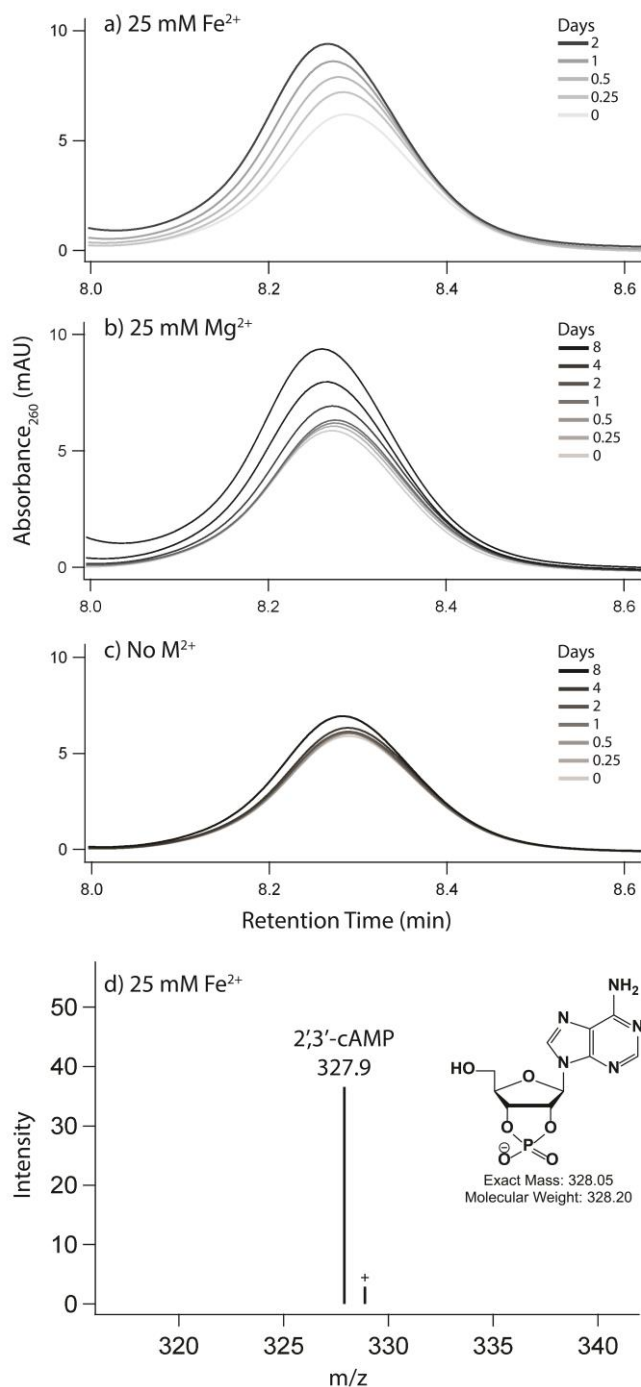

547

548 **Figure 3. 2',3'-cAMP is formed upon incubation of ApA with Fe<sup>2+</sup> or Mg<sup>2+</sup>.** HPLC  
549 chromatograms show the accumulation of 2',3'-cAMP, a direct product of an in-line cleavage  
550 mechanism, upon incubation of ApA with either a) 25 mM Fe<sup>2+</sup>, b) 25 mM Mg<sup>2+</sup>, or c) no metal  
551 for the negative control. Panel d shows identification of the 2',3'-cyclic adenosine monophosphate  
552 by LC-MS of ApA incubated with 25 mM Fe<sup>2+</sup> for 2 days. Labeled species correspond to [M-H]<sup>-</sup>  
553 ions. Reactions were incubated anoxically at 37°C in the presence of 5% (v/v) glycerol.



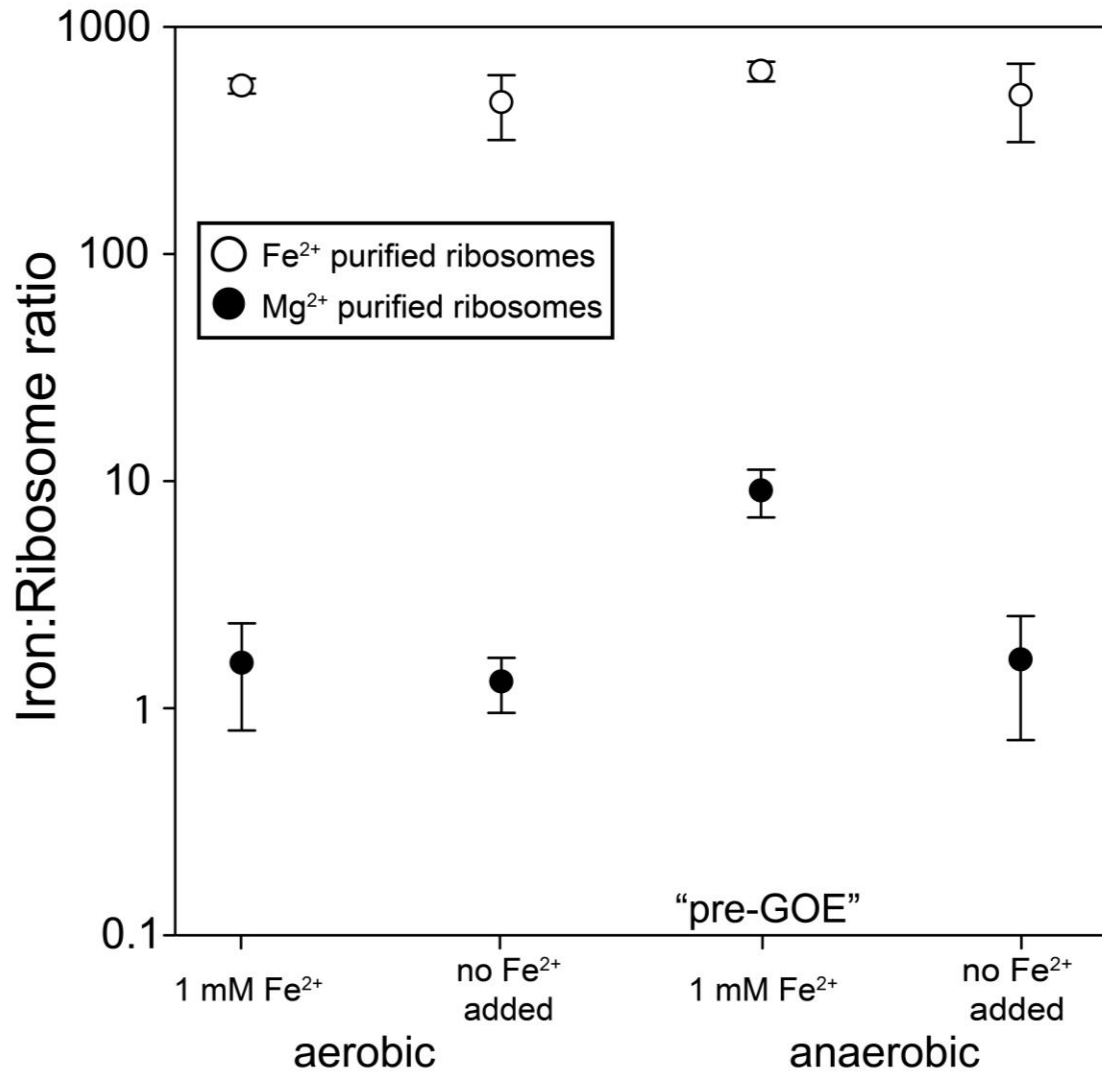

554

555 **Figure 4. Iron content (mol Fe mol<sup>-1</sup> ribosome) of purified ribosomes.** *E. coli* were grown  
556 aerobically or anaerobically at 1 mM Fe<sup>2+</sup> or ambient Fe<sup>2+</sup> (6-9 μM, no Fe added), and purified in  
557 buffers containing either 3 mM Mg<sup>2+</sup> (black circles) or 1 mM Fe<sup>2+</sup> (white circles). Error bars  
558 represent the S.E.M. (n=3).

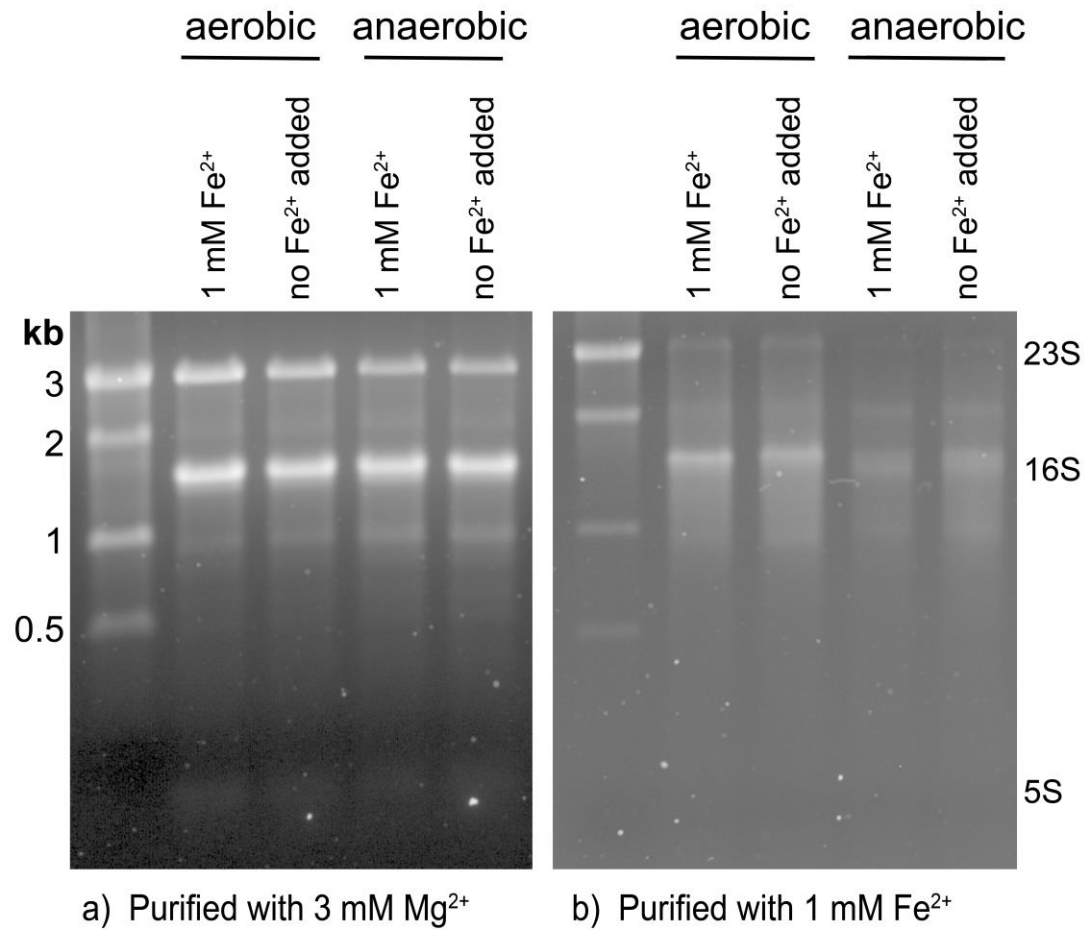

559

560 **Figure 5. 1% agarose gels showing rRNA from ribosomes purified in (a) 3 mM Mg<sup>2+</sup> and (b)**  
561 **1 mM Fe<sup>2+</sup>.** The banding pattern suggests that rRNA is relatively more intact in ribosomes purified  
562 with 3 mM Mg<sup>2+</sup> than in ribosomes purified with 1 mM Fe<sup>2+</sup>.

## References

- 563  
564
- 565 1. Bernier, C.R., Petrov, A.S., Kovacs, N.A., Penev, P.I. and Williams, L.D. (2018) Translation: The  
566 Universal Structural Core of Life. *Mol. Biol. Evol.*, **35**, 2065-2076.
  - 567 2. Melnikov, S., Ben-Shem, A., Garreau de Loubresse, N., Jenner, L., Yusupova, G. and Yusupov,  
568 M. (2012) One core, two shells: bacterial and eukaryotic ribosomes. *Nat. Struct. Mol. Biol.*, **19**,  
569 560-567.
  - 570 3. Woese, C.R. (2001) Translation: in retrospect and prospect. *RNA*, **7**, 1055-1067.
  - 571 4. Noller, H.F., Kop, J., Wheaton, V., Brosius, J., Gutell, R.R., Kopylov, A.M., Dohme, F., Herr, W.,  
572 Stahl, D.A. and Gupta, R. (1981) Secondary structure model for 23S ribosomal RNA. *Nucleic Acids*  
573 *Res.*, **9**, 6167-6189.
  - 574 5. Petrov, A.S., Bernier, C.R., Hsiao, C., Norris, A.M., Kovacs, N.A., Waterbury, C.C., Stepanov,  
575 V.G., Harvey, S.C., Fox, G.E., Wartell, R.M. *et al.* (2014) Evolution of the ribosome at atomic  
576 resolution. *Proc. Natl. Acad. Sci. USA*, **111**, 10251-10256.
  - 577 6. Bokov, K. and Steinberg, S.V. (2009) A hierarchical model for evolution of 23S ribosomal RNA.  
578 *Nature*, **457**, 977-980.
  - 579 7. Kovacs, N.A., Petrov, A.S., Lanier, K.A. and Williams, L.D. (2017) Frozen in Time: The History  
580 of Proteins. *Mol. Biol. Evol.*, **34**, 1252-1260.
  - 581 8. Agmon, I., Bashan, A. and Yonath, A. (2006) On ribosome conservation and evolution. *Isr. J. Ecol.*  
582 *Evol.*, **52**, 359-374.
  - 583 9. Klein, D.J., Moore, P.B. and Steitz, T.A. (2004) The contribution of metal ions to the structural  
584 stability of the large ribosomal subunit. *RNA*, **10**, 1366-1379.
  - 585 10. Anbar, A.D. (2008) Elements and evolution. *Science*, **322**, 1481-1483.
  - 586 11. Hazen, R.M. and Ferry, J.M. (2010) Mineral evolution: Mineralogy in the fourth dimension.  
587 *Elements*, **6**, 9-12.
  - 588 12. Holland, H.D. (2006) The oxygenation of the atmosphere and oceans. *Philos. Trans. R. Soc.*  
589 *London, Ser. B*, **361**, 903-915.
  - 590 13. Klein, C. (2005) Some Precambrian banded iron-formations (BIFs) from around the world: Their  
591 age, geologic setting, mineralogy, metamorphism, geochemistry, and origins. *Am. Mineral.*, **90**,  
592 1473-1499.
  - 593 14. Holland, H.D. (1973) The oceans; a possible source of iron in iron-formations. *Econ. Geol.*, **68**,  
594 1169-1172.
  - 595 15. Bowman, J.C., Lenz, T.K., Hud, N.V. and Williams, L.D. (2012) Cations in charge: magnesium  
596 ions in RNA folding and catalysis. *Curr. Opin. Struct. Biol.*, **22**, 262-272.
  - 597 16. Hsiao, C. and Williams, L.D. (2009) A recurrent magnesium-binding motif provides a framework  
598 for the ribosomal peptidyl transferase center. *Nucleic Acids Res.*, **37**, 3134-3142.

- 599 17. Lin, S.Y., Wang, Y.C. and Hsiao, C. (2019) Prebiotic Iron Originates the Peptidyl Transfer Origin.  
600 *Mol. Biol. Evol.*, **36**, 999-1007.
- 601 18. Schuwirth, B.S., Borovinskaya, M.A., Hau, C.W., Zhang, W., Vila-Sanjurjo, A., Holton, J.M. and  
602 Cate, J.H.D. (2005) Structures of the Bacterial Ribosome at 3.5 Å Resolution. *Science*, **310**, 827-  
603 834.
- 604 19. Selmer, M., Dunham, C.M., Murphy, F.V., Weixlbaumer, A., Petry, S., Kelley, A.C., Weir, J.R.  
605 and Ramakrishnan, V. (2006) Structure of the 70S ribosome complexed with mRNA and tRNA.  
606 *Science*, **313**, 1935-1942.
- 607 20. Demeshkina, N., Jenner, L., Westhof, E., Yusupov, M. and Yusupova, G. (2012) A new  
608 understanding of the decoding principle on the ribosome. *Nature*, **484**, 256-259.
- 609 21. Petrov, A.S., Bernier, C.R., Hsiao, C., Okafor, C.D., Tannenbaum, E., Stern, J., Gaucher, E.,  
610 Schneider, D., Hud, N.V., Harvey, S.C. *et al.* (2012) RNA-magnesium-protein interactions in large  
611 ribosomal subunit. *J. Phys. Chem. B*, **116**, 8113-8120.
- 612 22. Forconi, M. and Herschlag, D. (2009) Metal ion-based RNA cleavage as a structural probe.  
613 *Methods Enzymol.*, **468**, 91-106.
- 614 23. Soukup, G.A. and Breaker, R.R. (1999) Relationship between internucleotide linkage geometry  
615 and the stability of RNA. *RNA*, **5**, 1308-1325.
- 616 24. Winkler, W., Nahvi, A. and Breaker, R.R. (2002) Thiamine derivatives bind messenger RNAs  
617 directly to regulate bacterial gene expression. *Nature*, **419**, 952-956.
- 618 25. Winkler, W.C., Nahvi, A., Roth, A., Collins, J.A. and Breaker, R.R. (2004) Control of gene  
619 expression by a natural metabolite-responsive ribozyme. *Nature*, **428**, 281.
- 620 26. Dorner, S. and Barta, A. (1999) Probing ribosome structure by europium-induced RNA cleavage.  
621 *Biol. Chem.*, **380**, 243-251.
- 622 27. Winter, D., Polacek, N., Halama, I., Streicher, B. and Barta, A. (1997) Lead-catalysed specific  
623 cleavage of ribosomal RNAs. *Nucleic Acids Res.*, **25**, 1817-1824.
- 624 28. Pyle, A.M. (2002) Metal ions in the structure and function of RNA. *J. Biol. Inorg. Chem.*, **7**, 679-  
625 690.
- 626 29. Pan, T. and Uhlenbeck, O.C. (1992) In vitro selection of RNAs that undergo autolytic cleavage  
627 with lead (2+). *Biochemistry*, **31**, 3887-3895.
- 628 30. Winterbourn, C.C. (1995) Toxicity of iron and hydrogen peroxide: the Fenton reaction. *Toxicol.*  
629 *Lett.*, **82**, 969-974.
- 630 31. Fischbacher, A., von Sonntag, C. and Schmidt, T.C. (2017) Hydroxyl radical yields in the Fenton  
631 process under various pH, ligand concentrations and hydrogen peroxide/Fe(II) ratios.  
632 *Chemosphere*, **182**, 738-744.
- 633 32. Dixon, W.J., Hayes, J.J., Levin, J.R., Weidner, M.F., Dombroski, B.A. and Tullius, T.D. (1991)  
634 Hydroxyl radical footprinting. *Methods Enzymol.*, **208**, 380-413.

- 635 33. Tullius, T.D. (1996) In Suslick, K. (ed.), *Comprehensive Supramolecular Chemistry*. Elsevier,  
636 Tarrytown, NY, Vol. 5, pp. 317-343.
- 637 34. Celander, D.W. and Cech, T.R. (1991) Visualizing the higher order folding of a catalytic RNA  
638 molecule. *Science*, **251**, 401-407.
- 639 35. Li, Z., Wu, J. and Deleo, C.J. (2006) RNA damage and surveillance under oxidative stress. *IUBMB*  
640 *Life*, **58**, 581-588.
- 641 36. Shcherbik, N. and Pestov, D.G. (2019) The Impact of Oxidative Stress on Ribosomes: From Injury  
642 to Regulation. *Cells*, **8**, 1379.
- 643 37. Bray, M.S., Lenz, T.K., Haynes, J.W., Bowman, J.C., Petrov, A.S., Reddi, A.R., Hud, N.V.,  
644 Williams, L.D. and Glass, J.B. (2018) Multiple prebiotic metals mediate translation. *Proc. Natl.*  
645 *Acad. Sci. USA*, **115**, 12164-12169.
- 646 38. Li, Y. and Breaker, R.R. (1999) Kinetics of RNA Degradation by Specific Base Catalysis of  
647 Transesterification Involving the 2'-Hydroxyl Group. *J. Am. Chem. Soc.*, **121**, 5364-5372.
- 648 39. Kuusela, S. and Lönnberg, H. (1993) Metal ions that promote the hydrolysis of nucleoside  
649 phosphoesters do not enhance intramolecular phosphate migration. *J. Phys. Org.*, **6**, 347-356.
- 650 40. Hsiao, C., Lenz, T.K., Peters, J.K., Fang, P.-Y., Schneider, D.M., Anderson, E.J., Preeprem, T.,  
651 Bowman, J.C., O'Neill, E.B. and Lie, L. (2013) Molecular paleontology: a biochemical model of  
652 the ancestral ribosome. *Nucleic Acids Res.*, **41**, 3373-3385.
- 653 41. Riemer, J., Hoepken, H.H., Czerwinska, H., Robinson, S.R. and Dringen, R. (2004) Colorimetric  
654 ferrozine-based assay for the quantitation of iron in cultured cells. *Anal. Biochem.*, **331**, 370-375.
- 655 42. Maguire, B.A., Wondrack, L.M., Contillo, L.G. and Xu, Z. (2008) A novel chromatography system  
656 to isolate active ribosomes from pathogenic bacteria. *RNA*, **14**, 188-195.
- 657 43. Shimizu, Y., Inoue, A., Tomari, Y., Suzuki, T., Yokogawa, T., Nishikawa, K. and Ueda, T. (2001)  
658 Cell-free translation reconstituted with purified components. *Nature Biotechnol.*, **19**, 751-755.
- 659 44. Rappsilber, J., Mann, M. and Ishihama, Y. (2007) Protocol for micro-purification, enrichment, pre-  
660 fractionation and storage of peptides for proteomics using StageTips. *Nat Protoc*, **2**, 1896-1906.
- 661 45. Cox, J. and Mann, M. (2008) MaxQuant enables high peptide identification rates, individualized  
662 p.p.b.-range mass accuracies and proteome-wide protein quantification. *Nat. Biotechnol.*, **26**, 1367-  
663 1372.
- 664 46. Cox, J., Neuhauser, N., Michalski, A., Scheltema, R.A., Olsen, J.V. and Mann, M. (2011)  
665 Andromeda: a peptide search engine integrated into the MaxQuant environment. *J. Proteome. Res.*,  
666 **10**, 1794-1805.
- 667 47. Kurylo, C.M., Alexander, N., Dass, R.A., Parks, M.M., Altman, R.A., Vincent, C.T., Mason, C.E.  
668 and Blanchard, S.C. (2016) Genome Sequence and Analysis of *Escherichia coli* MRE600, a  
669 Colicinogenic, Nonmotile Strain that Lacks RNase I and the Type I Methyltransferase, EcoKI.  
670 *Genome Biol. Evol.*, **8**, 742-752.



- 671 48. Tyanova, S., Temu, T., Sinitcyn, P., Carlson, A., Hein, M.Y., Geiger, T., Mann, M. and Cox, J.  
672 (2016) The Perseus computational platform for comprehensive analysis of (prote)omics data. *Nat.*  
673 *Methods*, **13**, 731-740.
- 674 49. Tullius, T.D., Dombroski, B.A., Churchill, M.E. and Kam, L. (1987) Hydroxyl radical footprinting:  
675 A high-resolution method for mapping protein-DNA contacts. *Methods Enzymol.*, **155**, 537-558.
- 676 50. Pogozelski, W.K. and Tullius, T.D. (1998) Oxidative Strand Scission of Nucleic Acids: Routes  
677 Initiated by Hydrogen Abstraction from the Sugar Moiety. *Chem. Rev.*, **98**, 1089-1108.
- 678 51. Handing, K.B., Niedzialkowska, E., Shabalin, I.G., Kuhn, M.L., Zheng, H. and Minor, W. (2018)  
679 Characterizing metal-binding sites in proteins with X-ray crystallography. *Nat. Protoc.*, **13**, 1062.
- 680 52. Rivera, M.C., Maguire, B. and Lake, J.A. (2015) Isolation of Ribosomes and Polysomes. *Cold*  
681 *Spring Harb. Protoc.*, **2015**, pdb.prot081331.
- 682 53. Kuusela, S., Azhayev, A., Guzaev, A. and Lönnberg, H. (1995) The effect of the 3'-terminal  
683 monophosphate group on the metal-ion-promoted hydrolysis of the phosphodiester bonds of short  
684 oligonucleotides. *J. Chem. Soc. Perk. Trans. 2*, 1197-1202.
- 685 54. Kuusela, S. and Lönnberg, H. (1996) Zn<sup>2+</sup>-promoted hydrolysis of 3',5'-dinucleoside  
686 monophosphates and polyribonucleotides. The effect of nearest neighbours on the cleavage of  
687 phosphodiester bonds. *Nucleosides Nucleotides Nucl. Acids*, **15**, 1669-1678.
- 688 55. Kuusela, S. and Lönnberg, H. (1994) Metal-ion-promoted hydrolysis of polyuridylic acid. *J. Chem.*  
689 *Soc. Perk. Trans. 2*, 2301-2306.
- 690 56. Ikenaga, H. and Inoue, Y. (1974) Metal (II) ion catalyzed transphosphorylation of four  
691 homodinucleotides and five pairs of dinucleotide sequence isomers. *Biochemistry*, **13**, 577-582.
- 692 57. Breslow, R. and Huang, D.-L. (1991) Effects of metal ions, including Mg<sup>2+</sup> and lanthanides, on the  
693 cleavage of ribonucleotides and RNA model compounds. *Proc. Natl. Acad. Sci. USA*, **88**, 4080-  
694 4083.
- 695 58. Honda, K., Smith, M.A., Zhu, X., Baus, D., Merrick, W.C., Tartakoff, A.M., Hattier, T., Harris,  
696 P.L., Siedlak, S.L., Fujioka, H. *et al.* (2005) Ribosomal RNA in Alzheimer disease is oxidized by  
697 bound redox-active iron. *J Biol. Chem.*, **280**, 20978-20986.
- 698 59. Zinskie, J.A., Ghosh, A., Trainor, B.M., Shedlovskiy, D., Pestov, D.G. and Shcherbik, N. (2018)  
699 Iron-dependent cleavage of ribosomal RNA during oxidative stress in the yeast *Saccharomyces*  
700 *cerevisiae*. *J Biol. Chem.*, **293**, 14237-14248.
- 701 60. Athavale, S.S., Petrov, A.S., Hsiao, C., Watkins, D., Prickett, C.D., Gossett, J.J., Lie, L., Bowman,  
702 J.C., O'Neill, E. and Bernier, C.R. (2012) RNA folding and catalysis mediated by iron (II). *PLoS*  
703 *One*, **7**, e38024.
- 704 61. Moon, W.J. and Liu, J. (2020) Replacing Mg<sup>2+</sup> by Fe<sup>2+</sup> for RNA-Cleaving DNazymes.  
705 *ChemBioChem*, **21**, 401-407.

- 706 62. Okafor, C.D., Lanier, K.A., Petrov, A.S., Athavale, S.S., Bowman, J.C., Hud, N.V. and Williams,  
707 L.D. (2017) Iron mediates catalysis of nucleic acid processing enzymes: Support for Fe(II) as a  
708 cofactor before the Great Oxidation Event. *Nucleic Acids Res.*, **45**, 3634-3642.
- 709 63. Hsiao, C., Chou, I.-C., Okafor, C.D., Bowman, J.C., O'Neill, E.B., Athavale, S.S., Petrov, A.S.,  
710 Hud, N.V., Wartell, R.M., Harvey, S.C. *et al.* (2013) RNA with iron (II) as a cofactor catalyses  
711 electron transfer. *Nat. Chem.*, **5**, 525-528.
- 712 64. Ward, W.L., Plakos, K. and DeRose, V.J. (2014) Nucleic acid catalysis: metals, nucleobases, and  
713 other cofactors. *Chemical Reviews*, **114**, 4318-4342.
- 714 65. Okafor, C.D., Bowman, J.C., Hud, N.V., Glass, J.B. and Williams, L.D. (2018), *Prebiotic*  
715 *Chemistry and Chemical Evolution of Nucleic Acids*. Springer, pp. 227-243.
- 716
